# Supplementary material for: Potential energy surfaces for gas-surface reactions
Source: Royal Society of Chemistry journal article supplement (doi:10.1039/c0cp01843k), 2011-01-01
Supplement: c0cp01843k.pdf [file c0cp01843k.pdf]

## Silicon (111)

The fragmentation of Silicon (111) is carried out using a unit cell defined by the lattice vectors ( $\text{\AA}$ ):

$$\begin{aligned} a \text{ (xyz)} &= -5.4 \quad 0. \quad 0. \\ b \text{ (xyz)} &= 5.4 \quad 5.4 \quad 0. \\ c \text{ (xyz)} &= 5.4 \quad 0. \quad -5.4 \end{aligned}$$

There are eight atoms in the unit cell with coordinates (fractional coordinates, followed by Cartesian coordinates in  $\text{\AA}$ ):

|      |        |        |        |
|------|--------|--------|--------|
| 1 Si |        |        |        |
|      | 1.000  | 1.000  | 1.000  |
|      | 5.420  | -5.420 | -5.420 |
| 2 Si |        |        |        |
|      | 1.000  | 0.5000 | 0.5000 |
|      | 0.0000 | -2.710 | -2.710 |
| 3 Si |        |        |        |
|      | 1.000  | 0.5000 | 1.000  |
|      | 2.710  | -2.710 | -5.420 |
| 4 Si |        |        |        |
|      | 1.000  | 1.000  | 0.5000 |
|      | 2.710  | -5.420 | -2.710 |
| 5 Si |        |        |        |
|      | 0.7500 | 0.7500 | 0.7500 |
|      | 4.065  | -4.065 | -4.065 |
| 6 Si |        |        |        |
|      | 0.7500 | 0.2500 | 0.2500 |
|      | -1.355 | -1.355 | -1.355 |
| 7 Si |        |        |        |
|      | 0.7500 | 0.2500 | 0.7500 |
|      | 1.355  | -1.355 | -4.065 |
| 8 Si |        |        |        |
|      | 0.7500 | 0.7500 | 0.2500 |
|      | 1.355  | -4.065 | -1.355 |

These atoms are depicted in Figure 2(b).

## LEVEL 2

The bulk crystal structure fragments at Level 2 into 24 fragments. The  $F(k_1, k_2, k_3)$  fragments of Eq.(2.10) contain the atoms shown below, where "Atom" designates the number of the atom in the unit cell defined above; the lattice unit cell is defined by adding  $(k_1, k_2, k_3)$  to the indicated values below. For the cleaved crystal,  $(k_1, k_2, k_3)$  are integers with

$$\begin{aligned} -\infty < k_1 < -1, \\ -\infty < k_2 < \infty \\ -\infty < k_3 < \infty \end{aligned}$$

**Bulk fragments**

| Fragment Number | $f_n$ | Atom | $k_1$ | $k_2$ | $k_3$ |
|-----------------|-------|------|-------|-------|-------|
| 1               | 1     | 1    | -1    | 0     | 0     |
|                 |       | 5    | -1    | 0     | 0     |
|                 |       | 8    | -1    | 0     | 1     |
|                 |       | 7    | -1    | 1     | 0     |
|                 |       | 6    | 0     | 1     | 1     |
| 2               | 1     | 2    | -1    | 0     | 0     |
|                 |       | 6    | -1    | 0     | 0     |
|                 |       | 7    | -1    | 0     | 0     |
|                 |       | 8    | -1    | 0     | 0     |
|                 |       | 5    | 0     | 0     | 0     |
| 3               | 1     | 1    | -1    | 0     | 0     |
|                 |       | 3    | -2    | 0     | 0     |
|                 |       | 2    | -1    | 0     | 1     |
|                 |       | 4    | -1    | 0     | 1     |
|                 |       | 8    | -1    | 0     | 1     |
| 4               | 1     | 3    | -1    | 0     | 0     |
|                 |       | 5    | -1    | 0     | 0     |
|                 |       | 7    | -1    | 0     | 0     |
|                 |       | 6    | -1    | 0     | 1     |
|                 |       | 8    | 0     | 0     | 1     |
| 5               | 1     | 2    | -1    | 0     | 0     |
|                 |       | 3    | -1    | 0     | 0     |
|                 |       | 7    | -1    | 0     | 0     |
|                 |       | 4    | -2    | -1    | 0     |
|                 |       | 1    | -1    | -1    | 0     |
| 6               | 1     | 4    | -1    | 0     | 0     |
|                 |       | 5    | -1    | 0     | 0     |
|                 |       | 8    | -1    | 0     | 0     |
|                 |       | 6    | -1    | 1     | 0     |
|                 |       | 7    | 0     | 1     | 0     |
| 7               | 1     | 1    | -1    | 0     | 0     |
|                 |       | 3    | -1    | 0     | 0     |
|                 |       | 4    | -1    | 0     | 0     |

|    |    |   |    |    |    |
|----|----|---|----|----|----|
|    |    | 5 | -1 | 0  | 0  |
|    |    | 2 | -2 | 0  | 0  |
| 8  | 1  |   |    |    |    |
|    |    | 2 | -1 | 0  | 0  |
|    |    | 6 | -1 | 0  | 0  |
|    |    | 1 | -2 | -1 | -1 |
|    |    | 4 | -1 | -1 | 0  |
|    |    | 3 | -1 | 0  | -1 |
| 9  | -1 |   |    |    |    |
|    |    | 1 | -1 | 0  | 0  |
|    |    | 8 | -1 | 0  | 1  |
| 10 | -1 |   |    |    |    |
|    |    | 3 | -1 | 0  | 0  |
|    |    | 7 | -1 | 0  | 0  |
| 11 | -1 |   |    |    |    |
|    |    | 2 | -1 | 0  | 0  |
|    |    | 7 | -1 | 0  | 0  |
| 12 | -1 |   |    |    |    |
|    |    | 1 | -1 | 0  | 0  |
|    |    | 5 | -1 | 0  | 0  |
| 13 | -1 |   |    |    |    |
|    |    | 4 | -1 | 0  | 0  |
|    |    | 8 | -1 | 0  | 0  |
| 14 | -1 |   |    |    |    |
|    |    | 2 | -1 | 0  | 0  |
|    |    | 6 | -1 | 0  | 0  |
| 15 | -1 |   |    |    |    |
|    |    | 6 | 0  | 0  | 0  |
|    |    | 1 | -1 | -1 | -1 |
| 16 | -1 |   |    |    |    |
|    |    | 7 | -1 | 0  | 0  |
|    |    | 1 | -1 | -1 | 0  |
| 17 | -1 |   |    |    |    |
|    |    | 7 | 0  | 0  | 0  |
|    |    | 4 | -1 | -1 | 0  |
| 18 | -1 |   |    |    |    |
|    |    | 8 | 0  | 0  | 0  |
|    |    | 3 | -1 | 0  | -1 |
| 19 | -1 |   |    |    |    |
|    |    | 5 | 0  | 0  | 0  |

|    |    |  |   |    |    |    |
|----|----|--|---|----|----|----|
|    |    |  | 2 | -1 | 0  | 0  |
| 20 | -1 |  | 6 | -1 | 0  | 0  |
|    |    |  | 3 | -1 | 0  | -1 |
| 21 | -1 |  | 6 | -1 | 0  | 0  |
|    |    |  | 4 | -1 | -1 | 0  |
| 22 | -1 |  | 2 | -1 | 0  | 0  |
|    |    |  | 8 | -1 | 0  | 0  |
| 23 | -1 |  | 3 | -1 | 0  | 0  |
|    |    |  | 5 | -1 | 0  | 0  |
| 24 | -1 |  | 4 | -1 | 0  | 0  |
|    |    |  | 5 | -1 | 0  | 0  |

### Surface fragments

There are 20 surface fragments  $\{G(k_2, k_3)\}$  of Eq. (2.10) which contain the atoms shown below, where "Atom" designates the number of the atom in the unit cell defined above; the lattice unit cell is defined by adding  $(k_2, k_3)$  to the indicated values below. For the cleaved crystal,  $(k_1, k_2, k_3)$  are integers with

$$-\infty < k_2 < \infty$$

$$-\infty < k_3 < \infty$$

| Fragment Number | $g_n$ | Atom | $k_1$ | $k_2$ | $k_3$ |
|-----------------|-------|------|-------|-------|-------|
| 1               | 1     | 1    | -1    | 0     | 0     |
|                 |       | 5    | -1    | 0     | 0     |
|                 |       | 8    | -1    | 0     | 1     |
|                 |       | 7    | -1    | 1     | 0     |
| 2               | 1     | 2    | -1    | 0     | 0     |
|                 |       | 6    | -1    | 0     | 0     |
|                 |       | 7    | -1    | 0     | 0     |
|                 |       | 8    | -1    | 0     | 0     |
| 3               | 1     | 1    | -1    | 0     | 0     |
|                 |       | 3    | -2    | 0     | 0     |
|                 |       | 2    | -1    | 0     | 1     |

|    |    |   |    |    |    |
|----|----|---|----|----|----|
|    |    | 4 | -1 | 0  | 1  |
|    |    | 8 | -1 | 0  | 1  |
| 4  | 1  |   |    |    |    |
|    |    | 3 | -1 | 0  | 0  |
|    |    | 5 | -1 | 0  | 0  |
|    |    | 7 | -1 | 0  | 0  |
|    |    | 6 | -1 | 0  | 1  |
| 5  | 1  |   |    |    |    |
|    |    | 2 | -1 | 0  | 0  |
|    |    | 3 | -1 | 0  | 0  |
|    |    | 7 | -1 | 0  | 0  |
|    |    | 4 | -2 | -1 | 0  |
|    |    | 1 | -1 | -1 | 0  |
| 6  | 1  |   |    |    |    |
|    |    | 4 | -1 | 0  | 0  |
|    |    | 5 | -1 | 0  | 0  |
|    |    | 8 | -1 | 0  | 0  |
|    |    | 6 | -1 | 1  | 0  |
| 7  | 1  |   |    |    |    |
|    |    | 1 | -1 | 0  | 0  |
|    |    | 3 | -1 | 0  | 0  |
|    |    | 4 | -1 | 0  | 0  |
|    |    | 5 | -1 | 0  | 0  |
|    |    | 2 | -2 | 0  | 0  |
| 8  | 1  |   |    |    |    |
|    |    | 2 | -1 | 0  | 0  |
|    |    | 6 | -1 | 0  | 0  |
|    |    | 1 | -2 | -1 | -1 |
|    |    | 4 | -1 | -1 | 0  |
|    |    | 3 | -1 | 0  | -1 |
| 9  | -1 |   |    |    |    |
|    |    | 1 | -1 | 0  | 0  |
|    |    | 8 | -1 | 0  | 1  |
| 10 | -1 |   |    |    |    |
|    |    | 3 | -1 | 0  | 0  |
|    |    | 7 | -1 | 0  | 0  |
| 11 | -1 |   |    |    |    |
|    |    | 2 | -1 | 0  | 0  |
|    |    | 7 | -1 | 0  | 0  |
| 12 | -1 |   |    |    |    |
|    |    | 1 | -1 | 0  | 0  |
|    |    | 5 | -1 | 0  | 0  |

|    |    |   |    |    |    |  |
|----|----|---|----|----|----|--|
| 13 | -1 |   |    |    |    |  |
|    |    | 4 | -1 | 0  | 0  |  |
|    |    | 8 | -1 | 0  | 0  |  |
| 14 | -1 |   |    |    |    |  |
|    |    | 2 | -1 | 0  | 0  |  |
|    |    | 6 | -1 | 0  | 0  |  |
| 15 | -1 |   |    |    |    |  |
|    |    | 7 | -1 | 0  | 0  |  |
|    |    | 1 | -1 | -1 | 0  |  |
| 16 | -1 |   |    |    |    |  |
|    |    | 6 | -1 | 0  | 0  |  |
|    |    | 3 | -1 | 0  | -1 |  |
| 17 | -1 |   |    |    |    |  |
|    |    | 6 | -1 | 0  | 0  |  |
|    |    | 4 | -1 | -1 | 0  |  |
| 18 | -1 |   |    |    |    |  |
|    |    | 2 | -1 | 0  | 0  |  |
|    |    | 8 | -1 | 0  | 0  |  |
| 19 | -1 |   |    |    |    |  |
|    |    | 3 | -1 | 0  | 0  |  |
|    |    | 5 | -1 | 0  | 0  |  |
| 20 | -1 |   |    |    |    |  |
|    |    | 4 | -1 | 0  | 0  |  |
|    |    | 5 | -1 | 0  | 0  |  |

### LEVEL 1

Similarly, at Level 1, we have:

#### Bulk fragments

| Fragment Number | $f_n$ | Atom | $k_1$ | $k_2$ | $k_3$ |
|-----------------|-------|------|-------|-------|-------|
| 1               | 1     |      |       |       |       |
|                 |       | 1    | -1    | 0     | 0     |
|                 |       | 5    | -1    | 0     | 0     |
| 2               | 1     |      |       |       |       |
|                 |       | 2    | -1    | 0     | 0     |
|                 |       | 6    | -1    | 0     | 0     |
| 3               | 1     |      |       |       |       |
|                 |       | 3    | -1    | 0     | 0     |

|    |   |   |    |    |    |
|----|---|---|----|----|----|
|    |   | 5 | -1 | 0  | 0  |
| 4  | 1 | 4 | -1 | 0  | 0  |
|    |   | 5 | -1 | 0  | 0  |
| 5  | 1 | 2 | -1 | 0  | 0  |
|    |   | 7 | -1 | 0  | 0  |
| 6  | 1 | 2 | -1 | 0  | 0  |
|    |   | 8 | -1 | 0  | 0  |
| 7  | 1 | 6 | 0  | 0  | 0  |
|    |   | 1 | -1 | -1 | -1 |
| 8  | 1 | 7 | 0  | 0  | 0  |
|    |   | 4 | -1 | -1 | 0  |
| 9  | 1 | 8 | 0  | 0  | 0  |
|    |   | 3 | -1 | 0  | -1 |
| 10 | 1 | 5 | 0  | 0  | 0  |
|    |   | 2 | -1 | 0  | 0  |
| 11 | 1 | 7 | -1 | 0  | 0  |
|    |   | 1 | -1 | -1 | 0  |
| 12 | 1 | 6 | -1 | 0  | 0  |
|    |   | 4 | -1 | -1 | 0  |
| 13 | 1 | 8 | -1 | 0  | 0  |
|    |   | 1 | -1 | 0  | -1 |
| 14 | 1 | 6 | -1 | 0  | 0  |
|    |   | 3 | -1 | 0  | -1 |
| 15 | 1 | 3 | -1 | 0  | 0  |
|    |   | 7 | -1 | 0  | 0  |
| 16 | 1 | 4 | -1 | 0  | 0  |

|    |    |   |    |   |   |
|----|----|---|----|---|---|
|    |    | 8 | -1 | 0 | 0 |
| 17 | -3 | 5 | 0  | 0 | 0 |
| 18 | -3 | 6 | 0  | 0 | 0 |
| 19 | -3 | 2 | -1 | 0 | 0 |
| 20 | -3 | 3 | -1 | 0 | 0 |
| 21 | -3 | 7 | 0  | 0 | 0 |
| 22 | -3 | 4 | -1 | 0 | 0 |
| 23 | -3 | 8 | 0  | 0 | 0 |
| 24 | -3 | 1 | -1 | 0 | 0 |

### Surface fragments

There are 16 surface fragments at Level 1:

| Fragment Number | $g_n$ | Atom | $k_1$ | $k_2$ | $k_3$ |
|-----------------|-------|------|-------|-------|-------|
| 1               | -2    | 1    | -1    | -1    | -1    |
| 2               | -2    | 4    | -1    | -1    | 0     |
| 3               | -2    | 3    | -1    | 0     | -1    |
| 4               | -2    | 2    | -1    | 0     | 0     |
| 5               | 1     | 1    | -1    | 0     | 0     |
|                 |       | 5    | -1    | 0     | 0     |
| 6               | 1     | 2    | -1    | 0     | 0     |
|                 |       | 6    | -1    | 0     | 0     |



|    |   |   |    |    |    |
|----|---|---|----|----|----|
| 7  | 1 | 3 | -1 | 0  | 0  |
|    |   | 5 | -1 | 0  | 0  |
| 8  | 1 | 4 | -1 | 0  | 0  |
|    |   | 5 | -1 | 0  | 0  |
| 9  | 1 | 2 | -1 | 0  | 0  |
|    |   | 7 | -1 | 0  | 0  |
| 10 | 1 | 2 | -1 | 0  | 0  |
|    |   | 8 | -1 | 0  | 0  |
| 11 | 1 | 7 | -1 | 0  | 0  |
|    |   | 1 | -1 | -1 | 0  |
| 12 | 1 | 6 | -1 | 0  | 0  |
|    |   | 4 | -1 | -1 | 0  |
| 13 | 1 | 8 | -1 | 0  | 0  |
|    |   | 1 | -1 | 0  | -1 |
| 14 | 1 | 6 | -1 | 0  | 0  |
|    |   | 3 | -1 | 0  | -1 |
| 15 | 1 | 3 | -1 | 0  | 0  |
|    |   | 7 | -1 | 0  | 0  |
| 16 | 1 | 4 | -1 | 0  | 0  |
|    |   | 8 | -1 | 0  | 0  |

### **Silicon (100)**

The fragmentation of Silicon (111) is carried out using a unit cell defined by the lattice vectors ( $\text{\AA}$ ):

$$\begin{aligned}
 \mathbf{a} \text{ (xyz)} &= -5.4 \quad 0. \quad 0. \\
 \mathbf{b} \text{ (xyz)} &= 0. \quad 5.4 \quad 0. \\
 \mathbf{c} \text{ (xyz)} &= 0. \quad 0. \quad 5.4
 \end{aligned}$$

There are eight atoms in the unit cell with coordinates (fractional coordinates, followed by Cartesian coordinates):

|   |        |        |        |  |
|---|--------|--------|--------|--|
| 1 | Si     |        |        |  |
|   | 1.000  | 1.000  | 1.000  |  |
|   | -5.420 | 5.420  | 5.420  |  |
| 2 | Si     |        |        |  |
|   | 1.000  | 0.5000 | 0.5000 |  |
|   | -5.420 | 2.710  | 2.710  |  |
| 3 | Si     |        |        |  |
|   | 0.5000 | 0.5000 | 1.000  |  |
|   | -2.710 | 2.710  | 5.420  |  |
| 4 | Si     |        |        |  |
|   | 0.5000 | 1.000  | 0.5000 |  |
|   | -2.710 | 5.420  | 2.710  |  |
| 5 | Si     |        |        |  |
|   | 0.2500 | 0.2500 | 0.2500 |  |
|   | -1.355 | 1.355  | 1.355  |  |
| 6 | Si     |        |        |  |
|   | 0.2500 | 0.7500 | 0.7500 |  |
|   | -1.355 | 4.065  | 4.065  |  |
| 7 | Si     |        |        |  |
|   | 0.7500 | 0.7500 | 0.2500 |  |
|   | -4.065 | 4.065  | 1.355  |  |
| 8 | Si     |        |        |  |
|   | 0.7500 | 0.2500 | 0.7500 |  |
|   | -4.065 | 1.355  | 4.065  |  |

These atoms are depicted in Figure 2(a).

## LEVEL 2

### Bulk fragments

| Fragment Number | $f_n$ | Atom | $k_1$ | $k_2$ | $k_3$ |
|-----------------|-------|------|-------|-------|-------|
| 1               | 1     | 1    | -1    | 0     | 0     |
|                 |       | 7    | -1    | 0     | 1     |
|                 |       | 8    | -1    | 1     | 0     |
|                 |       | 6    | 0     | 0     | 0     |
|                 |       | 5    | 0     | 1     | 1     |
| 2               | 1     | 2    | -1    | 0     | 0     |
|                 |       | 7    | -1    | 0     | 0     |
|                 |       | 8    | -1    | 0     | 0     |
|                 |       | 5    | 0     | 0     | 0     |
|                 |       | 6    | 0     | 0     | 0     |
| 3               | 1     | 1    | -1    | 0     | 0     |

|    |    |   |    |    |    |
|----|----|---|----|----|----|
|    |    | 4 | -1 | 0  | 0  |
|    |    | 2 | -1 | 1  | 0  |
|    |    | 3 | -1 | 1  | 0  |
|    |    | 8 | -1 | 1  | 0  |
| 4  | 1  |   |    |    |    |
|    |    | 3 | 0  | 0  | 0  |
|    |    | 6 | 0  | 0  | 0  |
|    |    | 8 | 0  | 0  | 0  |
|    |    | 5 | 0  | 0  | 1  |
|    |    | 7 | 0  | 0  | 1  |
| 5  | 1  |   |    |    |    |
|    |    | 4 | 0  | 0  | 0  |
|    |    | 6 | 0  | 0  | 0  |
|    |    | 7 | 0  | 0  | 0  |
|    |    | 5 | 0  | 1  | 0  |
|    |    | 8 | 0  | 1  | 0  |
| 6  | 1  |   |    |    |    |
|    |    | 5 | 0  | 0  | 0  |
|    |    | 1 | -1 | -1 | -1 |
|    |    | 2 | -1 | 0  | 0  |
|    |    | 4 | 0  | -1 | 0  |
|    |    | 3 | 0  | 0  | -1 |
| 7  | 1  |   |    |    |    |
|    |    | 3 | 0  | 0  | 0  |
|    |    | 4 | 0  | 0  | 0  |
|    |    | 6 | 0  | 0  | 0  |
|    |    | 1 | -1 | 0  | 0  |
|    |    | 2 | -1 | 0  | 0  |
| 8  | 1  |   |    |    |    |
|    |    | 2 | -1 | 0  | 0  |
|    |    | 4 | -1 | 0  | 0  |
|    |    | 7 | -1 | 0  | 0  |
|    |    | 1 | -1 | 0  | -1 |
|    |    | 3 | -1 | 0  | -1 |
| 9  | -1 |   |    |    |    |
|    |    | 1 | -1 | 0  | 0  |
|    |    | 8 | -1 | 1  | 0  |
| 10 | -1 |   |    |    |    |
|    |    | 3 | 0  | 0  | 0  |
|    |    | 8 | 0  | 0  | 0  |
| 11 | -1 |   |    |    |    |
|    |    | 2 | -1 | 0  | 0  |
|    |    | 8 | -1 | 0  | 0  |

|    |    |        |          |         |         |
|----|----|--------|----------|---------|---------|
| 12 | -1 | 4<br>8 | 0<br>0   | 0<br>1  | 0<br>0  |
| 13 | -1 | 3<br>6 | 0<br>0   | 0<br>0  | 0<br>0  |
| 14 | -1 | 5<br>2 | 0<br>-1  | 0<br>0  | 0<br>0  |
| 15 | -1 | 2<br>7 | -1<br>-1 | 0<br>0  | 0<br>0  |
| 16 | -1 | 5<br>1 | 0<br>-1  | 0<br>-1 | 0<br>-1 |
| 17 | -1 | 6<br>1 | 0<br>-1  | 0<br>0  | 0<br>0  |
| 18 | -1 | 5<br>4 | 0<br>0   | 0<br>-1 | 0<br>0  |
| 19 | -1 | 7<br>1 | -1<br>-1 | 0<br>0  | 0<br>-1 |
| 20 | -1 | 5<br>3 | 0<br>0   | 0<br>0  | 0<br>-1 |
| 21 | -1 | 3<br>7 | 0<br>0   | 0<br>0  | 0<br>1  |
| 22 | -1 | 2<br>6 | -1<br>0  | 0<br>0  | 0<br>0  |
| 23 | -1 | 4<br>6 | 0<br>0   | 0<br>0  | 0<br>0  |
| 24 | -1 | 4<br>7 | 0<br>0   | 0<br>0  | 0<br>0  |

There are 8 surface fragments:

**Surface fragments**

| Fragment Number | $g_n$ | Atom | $k_1$ | $k_2$ | $k_3$ |
|-----------------|-------|------|-------|-------|-------|
| 1               | 1     | 1    | -1    | 0     | 0     |
|                 |       | 7    | -1    | 0     | 1     |
|                 |       | 8    | -1    | 1     | 0     |
| 2               | 1     | 2    | -1    | 0     | 0     |
|                 |       | 7    | -1    | 0     | 0     |
|                 |       | 8    | -1    | 0     | 0     |
| 3               | 1     | 1    | -1    | 0     | 0     |
|                 |       | 4    | -1    | 0     | 0     |
|                 |       | 2    | -1    | 1     | 0     |
|                 |       | 3    | -1    | 1     | 0     |
|                 |       | 8    | -1    | 1     | 0     |
| 4               | 1     | 2    | -1    | 0     | 0     |
|                 |       | 4    | -1    | 0     | 0     |
|                 |       | 7    | -1    | 0     | 0     |
|                 |       | 1    | -1    | 0     | -1    |
|                 |       | 3    | -1    | 0     | -1    |
| 5               | -1    | 1    | -1    | 0     | 0     |
|                 |       | 8    | -1    | 1     | 0     |
| 6               | -1    | 2    | -1    | 0     | 0     |
|                 |       | 8    | -1    | 0     | 0     |
| 7               | -1    | 2    | -1    | 0     | 0     |
|                 |       | 7    | -1    | 0     | 0     |
| 8               | -1    | 7    | -1    | 0     | 0     |
|                 |       | 1    | -1    | 0     | -1    |

**LEVEL 1**

**Bulk fragments**

| Fragment Number | $f_n$ | Atom | $k_1$ | $k_2$ | $k_3$ |
|-----------------|-------|------|-------|-------|-------|
| 1               | 1     | 1    | -1    | 0     | 0     |
|                 |       | 7    | -1    | 0     | 1     |
| 2               | 1     | 2    | -1    | 0     | 0     |
|                 |       | 7    | -1    | 0     | 0     |
| 3               | 1     | 3    | 0     | 0     | 0     |
|                 |       | 7    | 0     | 0     | 1     |
| 4               | 1     | 4    | 0     | 0     | 0     |
|                 |       | 7    | 0     | 0     | 0     |
| 5               | 1     | 5    | 0     | 0     | 0     |
|                 |       | 1    | -1    | -1    | -1    |
| 6               | 1     | 3    | 0     | 0     | 0     |
|                 |       | 6    | 0     | 0     | 0     |
| 7               | 1     | 3    | 0     | 0     | 0     |
|                 |       | 8    | 0     | 0     | 0     |
| 8               | 1     | 6    | 0     | 0     | 0     |
|                 |       | 1    | -1    | 0     | 0     |
| 9               | 1     | 6    | 0     | 0     | 0     |
|                 |       | 2    | -1    | 0     | 0     |
| 10              | 1     | 8    | -1    | 0     | 0     |
|                 |       | 1    | -1    | -1    | 0     |
| 11              | 1     | 8    | 0     | 0     | 0     |
|                 |       | 4    | 0     | -1    | 0     |
| 12              | 1     | 3    | 0     | 0     | 0     |
|                 |       | 5    | 0     | 0     | 1     |

|    |    |   |    |    |   |
|----|----|---|----|----|---|
| 13 | 1  | 2 | -1 | 0  | 0 |
|    |    | 8 | -1 | 0  | 0 |
| 14 | 1  | 4 | 0  | 0  | 0 |
|    |    | 6 | 0  | 0  | 0 |
| 15 | 1  | 5 | 0  | 0  | 0 |
|    |    | 2 | -1 | 0  | 0 |
| 16 | 1  | 5 | 0  | 0  | 0 |
|    |    | 4 | 0  | -1 | 0 |
| 17 | -3 | 7 | 0  | 0  | 0 |
| 18 | -3 | 3 | 0  | 0  | 0 |
| 19 | -3 | 8 | 0  | 0  | 0 |
| 20 | -3 | 6 | 0  | 0  | 0 |
| 21 | -3 | 5 | 0  | 0  | 0 |
| 22 | -3 | 4 | 0  | 0  | 0 |
| 23 | -3 | 1 | -1 | 0  | 0 |
| 24 | -3 | 2 | -1 | 0  | 0 |

There are 6 surface fragments:

**Surface fragments**

| Fragment Number | $g_n$ | Atom | $k_1$ | $k_2$ | $k_3$ |
|-----------------|-------|------|-------|-------|-------|
| 1               | -1    | 1    | -1    | -1    | -1    |
| 2               | -1    |      |       |       |       |

|   |   |   |    |    |   |
|---|---|---|----|----|---|
|   |   | 2 | -1 | 0  | 0 |
| 3 | 1 | 1 | -1 | 0  | 0 |
|   |   | 7 | -1 | 0  | 1 |
| 4 | 1 | 2 | -1 | 0  | 0 |
|   |   | 7 | -1 | 0  | 0 |
| 5 | 1 | 8 | -1 | 0  | 0 |
|   |   | 1 | -1 | -1 | 0 |
| 6 | 1 | 2 | -1 | 0  | 0 |
|   |   | 8 | -1 | 0  | 0 |
